# Supplementary material for: High Plasmodium falciparum longitudinal prevalence is associated with high multiclonality and reduced clinical malaria risk in a seasonal transmission area of Mali
Source: PubMed Central journal article supplement (PMC5291380; doi:10.1371/journal.pone.0170948), 2017-02-03
Supplement: pone.0170948.s001.pdf [file pone.0170948.s001.pdf]

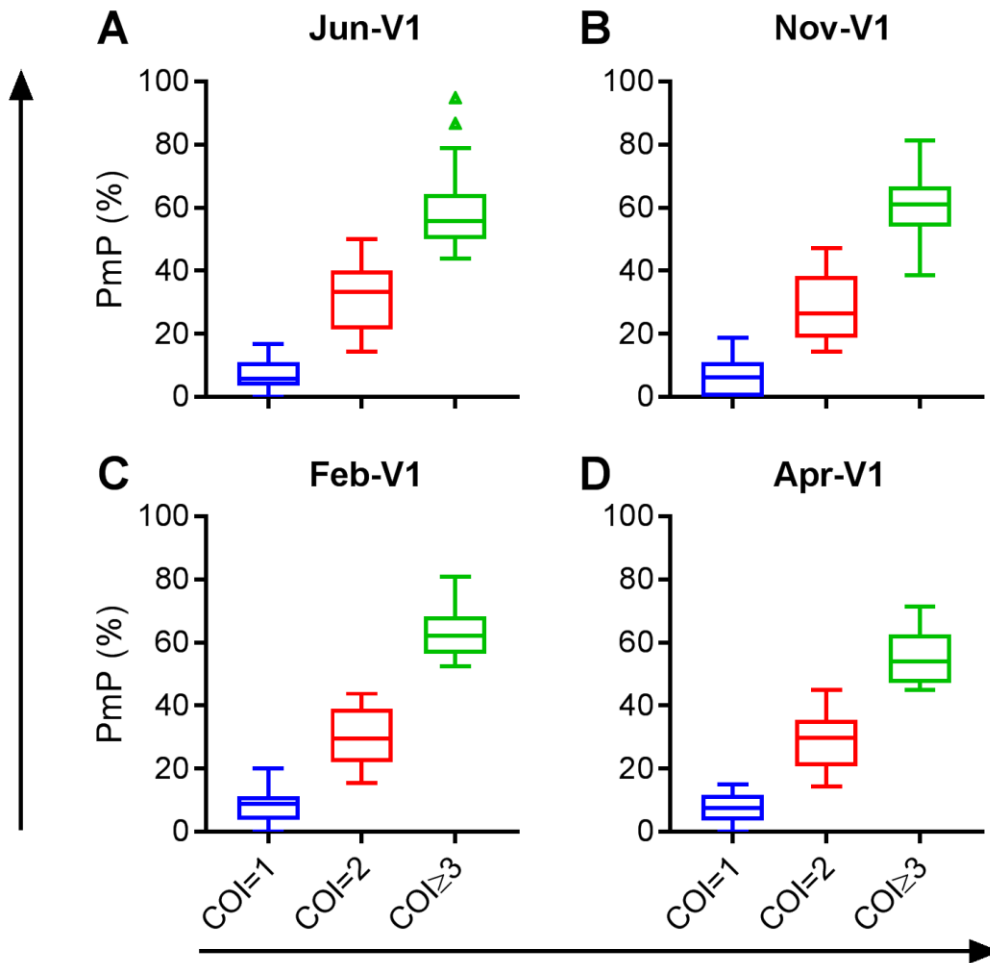

**S1 Fig. Distribution of polymorphic proportion (PmP) values among 3 COIL-estimated complexity of infection (COI) levels.** At all 4 time-points (A-D), individuals with high COI also had high PmP (Kruskal-Wallis test, all  $P < 0.001$ ).
