# Supplementary material for: High Plasmodium falciparum longitudinal prevalence is associated with high multiclonality and reduced clinical malaria risk in a seasonal transmission area of Mali
Source: PLoS One. 2017 Feb 3;12(2):e0170948. doi: 10.1371/journal.pone.0170948 (PMC5291380; doi:10.1371/journal.pone.0170948)
Supplement: S3 Table — (XLSX) [file pone.0170948.s004.xlsx]

## Sheet: All barcode data by reaction
	SNP locus	A01	B01	A02	B02	A03	B03	A04	B04	A05	B05	A06	B06	A07	B07	A08	B08	A09	B09	A10	B10	A11	B11	A12	B12
Jun-V1	Single Genotype	83	10	18	40	85	76	67	90	56	73	67	62	9	60	72	84	52	44	32	72	77	72	66	120
	Multiple Genotypes	36	3	10	19	30	42	40	25	52	37	38	53	5	29	40	33	24	44	21	37	42	48	10	3
	Failed Assays	7	113	98	67	11	8	19	11	18	16	21	11	112	37	14	9	50	38	73	17	7	6	50	3
Nov-V1	Single Genotype	61	5	28	63	30	50	19	100	27	62	70	70	28	74	62	91	0	60	63	70	39	82	106	120
	Multiple Genotypes	27	0	26	44	36	38	15	16	11	24	40	40	24	38	20	23	0	48	29	23	17	43	8	0
	Failed Assays	47	130	81	28	69	47	101	19	97	49	25	25	83	23	53	21	135	27	43	42	79	10	21	15
Feb-V1	Single Genotype	33	0	27	0	22	26	25	40	24	35	24	27	13	25	24	36	32	18	15	37	33	25	9	48
	Multiple Genotypes	17	0	17	0	8	20	24	12	25	14	22	13	15	23	27	15	14	24	6	13	17	26	5	3
	Failed Assays	8	58	14	58	28	12	9	6	9	9	12	18	30	10	7	7	12	16	37	8	8	7	44	7
Apr-v1	Single Genotype	26	5	21	31	20	26	17	31	26	23	17	18	0	18	32	32	23	15	22	34	29	26	27	39
	Multiple Genotypes	14	1	13	8	10	17	12	7	15	9	22	22	0	11	11	10	10	22	16	9	13	17	4	2
	Failed Assays	3	37	9	4	13	0	14	5	2	11	4	3	43	14	0	1	10	6	5	0	1	0	12	2
